# Supplementary material for: Antimicrobial Biosynthetic Potential and Phylogenetic Analysis of Culturable Bacteria Associated with the Sponge Ophlitaspongia sp. from the Yellow Sea, China
Source: MDPI journal article supplement (doi:10.3390/md20100588), 2022-09-21
Supplement: s1 [file s1]

## Supplementary Materials

**Table S1** Antimicrobial activities of the isolated strains associated with the sponge *Ophlitaspongia* sp.

| Test strains | Inhibition degree against indicator strains |      |      |      |      |      |      |
|--------------|---------------------------------------------|------|------|------|------|------|------|
|              | Bs                                          | Sa   | Ec   | Pa   | Va   | Vp   | Ca   |
| HMA001       | ++                                          | ++   | -    | -    | -    | -    | -    |
| HMA003       | -                                           | ++++ | -    | -    | -    | -    | -    |
| HMA004       | +++                                         | ++   | -    | -    | -    | -    | -    |
| HMA005       | +++                                         | ++   | -    | -    | -    | -    | +++  |
| HMA006       | ++                                          | ++   | -    | -    | -    | -    | -    |
| HMA007       | -                                           | ++   | -    | -    | -    | -    | -    |
| HMA008       | -                                           | ++++ | ++++ | ++++ | ++++ | ++++ | -    |
| HMA010       | +++                                         | ++++ | -    | -    | -    | +    | ++   |
| HMA011       | ++++                                        | +++  | -    | -    | ++   | ++   | +++  |
| HMA012       | ++                                          | ++   | -    | -    | -    | -    | ++   |
| HMA013       | +                                           | +++  | -    | -    | -    | -    | -    |
| HMA015       | +                                           | ++   | -    | -    | -    | -    | ++   |
| HMA016       | ++                                          | +++  | -    | -    | -    | -    | +++  |
| HMA019       | -                                           | +    | -    | -    | -    | -    | -    |
| HMA020       | -                                           | +    | -    | -    | -    | -    | ++++ |
| HMA022       | -                                           | ++++ | -    | -    | -    | -    | -    |
| HMA023       | +++                                         | +++  | -    | -    | -    | ++   | -    |
| HMA025       | -                                           | +++  | -    | -    | -    | -    | -    |
| HMA026       | +++                                         | +++  | -    | -    | -    | -    | +++  |
| HMA027       | +++                                         | ++++ | -    | -    | -    | -    | +++  |
| HMA028       | -                                           | +++  | -    | -    | -    | -    | -    |
| HMA029       | +                                           | +    | -    | -    | -    | -    | -    |
| HMA031       | -                                           | ++   | -    | -    | -    | +    | +++  |
| HMA032       | ++++                                        | -    | -    | -    | -    | -    | ++   |
| HMA033       | ++++                                        | +    | -    | -    | -    | +    | ++++ |
| HMA034       | +++                                         | ++++ | -    | -    | -    | -    | ++   |
| HMA035       | +++                                         | +++  | -    | -    | -    | -    | +++  |
| HMB001       | ++                                          | -    | -    | -    | -    | -    | -    |
| HMB005       | ++                                          | ++   | -    | -    | -    | -    | ++   |
| HMB008       | -                                           | -    | -    | -    | +    | ++   | ++   |
| HMB009       | +                                           | +++  | -    | -    | -    | -    | -    |
| HMB010       | +                                           | +    | -    | -    | -    | -    | ++   |
| HMB012       | +                                           | +++  | -    | -    | -    | -    | -    |
| HMB014       | -                                           | +++  | -    | -    | -    | -    | -    |
| HMB019       | ++                                          | ++   | -    | -    | -    | -    | +++  |
| HMB020       | +++                                         | ++   | -    | -    | -    | -    | -    |
| HMB021       | +++                                         | ++   | -    | -    | -    | -    | -    |

Table S1 (continued)

| Test strains | Inhibition degree against indicator strains |      |    |    |    |    |     |
|--------------|---------------------------------------------|------|----|----|----|----|-----|
|              | Bs                                          | Sa   | Ec | Pa | Va | Vp | Ca  |
| HMB022       | ++                                          | +++  | -  | -  | -  | -  | -   |
| HMB023       | ++                                          | ++   | -  | -  | -  | -  | -   |
| HMB024       | ++                                          | ++++ | -  | -  | -  | -  | -   |
| HMB025       | +++                                         | -    | -  | -  | -  | -  | -   |
| HMB026       | -                                           | ++   | -  | -  | -  | -  | -   |
| HMB028       | -                                           | ++   | -  | -  | -  | -  | -   |
| HMB030       | -                                           | ++   | -  | -  | -  | -  | -   |
| HMB031       | +                                           | +++  | -  | -  | -  | -  | -   |
| HMB032       | -                                           | +++  | -  | -  | -  | -  | ++  |
| HMB033       | -                                           | ++   | -  | -  | -  | -  | -   |
| HMB037       | ++                                          | -    | -  | -  | -  | -  | -   |
| HMB038       | -                                           | ++   | -  | -  | -  | -  | -   |
| HMB040       | ++                                          | ++   | -  | -  | -  | -  | -   |
| HMB041       | +                                           | +    | -  | -  | -  | -  | -   |
| HMB042       | -                                           | ++++ | -  | -  | -  | -  | -   |
| HMB046       | ++++                                        | ++++ | ++ | -  | -  | -  | -   |
| HMB047       | ++                                          | ++   | -  | -  | -  | -  | -   |
| HMB048       | -                                           | +    | -  | -  | -  | -  | -   |
| HMB050       | ++++                                        | ++++ | -  | -  | -  | -  | ++  |
| HMB054       | ++                                          | +++  | -  | -  | -  | -  | -   |
| HMB057       | -                                           | ++++ | -  | -  | -  | -  | -   |
| HMB058       | -                                           | ++   | -  | -  | -  | -  | -   |
| HMB060       | +++                                         | +++  | -  | -  | -  | -  | -   |
| HMB061       | ++++                                        | -    | -  | -  | -  | -  | +++ |
| HMB063       | ++                                          | -    | -  | -  | -  | -  | -   |
| HMB064       | ++                                          | ++   | -  | -  | -  | -  | -   |
| HMB065       | -                                           | ++   | -  | -  | -  | -  | -   |
| HMB066       | -                                           | ++   | -  | -  | -  | -  | -   |
| HMB067       | -                                           | ++   | -  | -  | -  | -  | -   |
| HMB069       | -                                           | ++++ | -  | -  | -  | -  | -   |
| HMB070       | -                                           | ++   | -  | -  | -  | -  | -   |
| HMB072       | +++                                         | +++  | -  | -  | -  | -  | -   |
| HMB080       | -                                           | -    | -  | -  | -  | -  | +++ |
| HMB083       | +++                                         | +++  | -  | -  | -  | -  | ++  |
| HMB085       | ++                                          | -    | -  | -  | -  | -  | ++  |
| HMB087       | -                                           | ++++ | -  | -  | -  | -  | -   |
| HMB088       | -                                           | +++  | -  | -  | -  | -  | -   |
| HMB091       | ++++                                        | ++   | -  | -  | -  | -  | -   |
| HMB092       | ++                                          | ++   | -  | -  | -  | -  | -   |

Table S1 (continued)

| Test strains | Inhibition degree against indicator strains |      |    |    |    |    |      |
|--------------|---------------------------------------------|------|----|----|----|----|------|
|              | Bs                                          | Sa   | Ec | Pa | Va | Vp | Ca   |
| HMB093       | +                                           | +++  | -  | -  | -  | -  | -    |
| HMB094       | ++                                          | ++   | -  | -  | -  | -  | -    |
| HMB095       | +                                           | +++  | -  | -  | -  | -  | -    |
| HMB096       | ++                                          | ++++ | -  | -  | -  | -  | ++++ |
| HMB097       | -                                           | ++++ | -  | -  | -  | -  | -    |
| HMB098       | +++                                         | +++  | -  | -  | -  | -  | ++++ |
| HMB099       | -                                           | ++   | -  | -  | -  | -  | -    |
| HMB100       | -                                           | ++++ | -  | -  | -  | -  | -    |
| HMB102       | ++++                                        | ++++ | -  | -  | -  | -  | ++   |
| HMB105       | -                                           | +++  | -  | -  | -  | -  | -    |
| HMB106       | -                                           | +++  | -  | -  | -  | -  | -    |
| HMB107       | ++++                                        | ++++ | -  | -  | -  | -  | -    |
| HMB108       | ++                                          | -    | -  | -  | -  | -  | -    |
| HMB109       | +++                                         | +++  | -  | -  | -  | -  | -    |
| HMB110       | +++                                         | ++++ | -  | -  | -  | -  | -    |
| HMB111       | +                                           | +++  | -  | -  | -  | -  | -    |
| HMB113       | ++                                          | -    | -  | -  | -  | -  | -    |
| HMB114       | ++++                                        | +++  | -  | -  | -  | -  | +++  |

Only the bacterial strains with antimicrobial activities against at least three indicator strains were listed on the table.

Antimicrobial activities were tested against *Bacillus subtilis* (Bs), *Staphylococcus aureus* (Sa), *Escherichia coli* (Ec), *Pseudomonas aeruginosa* (Pa), *Vibrio anguillarum* (Va), *Vibrio parahaemolyticus* (Vp), and *Candida albicans* (Ca).

Symbols of inhibition degree against indicator strains: (–), no inhibition; (+), 6 < inhibition zone < 8 mm;

(++), 8 ≤ inhibition zone < 10 mm; (+++), 10 ≤ inhibition zone < 12 mm; (++++), inhibition zone ≥ 12 mm.

**Table S2** Secondary metabolite biosynthetic gene clusters (BGCs) in the genome of *Notoacmeibacter* sp.

HMA008.

| Type                                          | Location<br>(From-To) | Similar known<br>cluster | Classification | Similarity<br>(%) | Core gene<br>locus tag                                  |
|-----------------------------------------------|-----------------------|--------------------------|----------------|-------------------|---------------------------------------------------------|
| Beta-lactone containing protease<br>inhibitor | 189059-212033         | Fengycin                 | NRP            | 13%               | ctg17_184,<br>ctg17_185                                 |
| Beta-lactone containing protease<br>inhibitor | 189509-212033         | Fengycin                 | NRP            | 13%               | ctg27_186,<br>ctg27_187                                 |
| Butyrolactone cluster                         | 634359-645132         | -                        | -              | -                 | ctg18_588                                               |
| Butyrolactone cluster                         | 134264-145037         | -                        | -              | -                 | ctg23_117                                               |
| Homoserine lactone cluster                    | 17559-31574           | -                        | -              | -                 | ctg8_38                                                 |
| N-acetylglutaminyglutamine<br>amide           | 489072-503734         | -                        | -              | -                 | ctg15_478,<br>ctg15_479,<br>ctg15_480                   |
| NRPS                                          | 1-13248               | -                        | -              | -                 | ctg4_9                                                  |
| NRPS                                          | 1-13375               | Aurantimucin A           | NPR+Polyketide | 6%                | ctg5_7                                                  |
| Prodigiosin                                   | 4334-40131            | Prodigiosin              | Polyketide     | 38%               | ctg9_31,<br>ctg9_35,<br>ctg9_36,<br>ctg9_37,<br>ctg9_41 |
| RiPP-like                                     | 206011-216895         | -                        | -              | -                 | ctg15_212                                               |
| Siderophore cluster                           | 1949-16218            | Ochrobactin              | Others         | 42%               | ctg14_9,<br>ctg14_11                                    |
| Terpene                                       | 74124-94957           | -                        | -              | -                 | ctg13_82                                                |

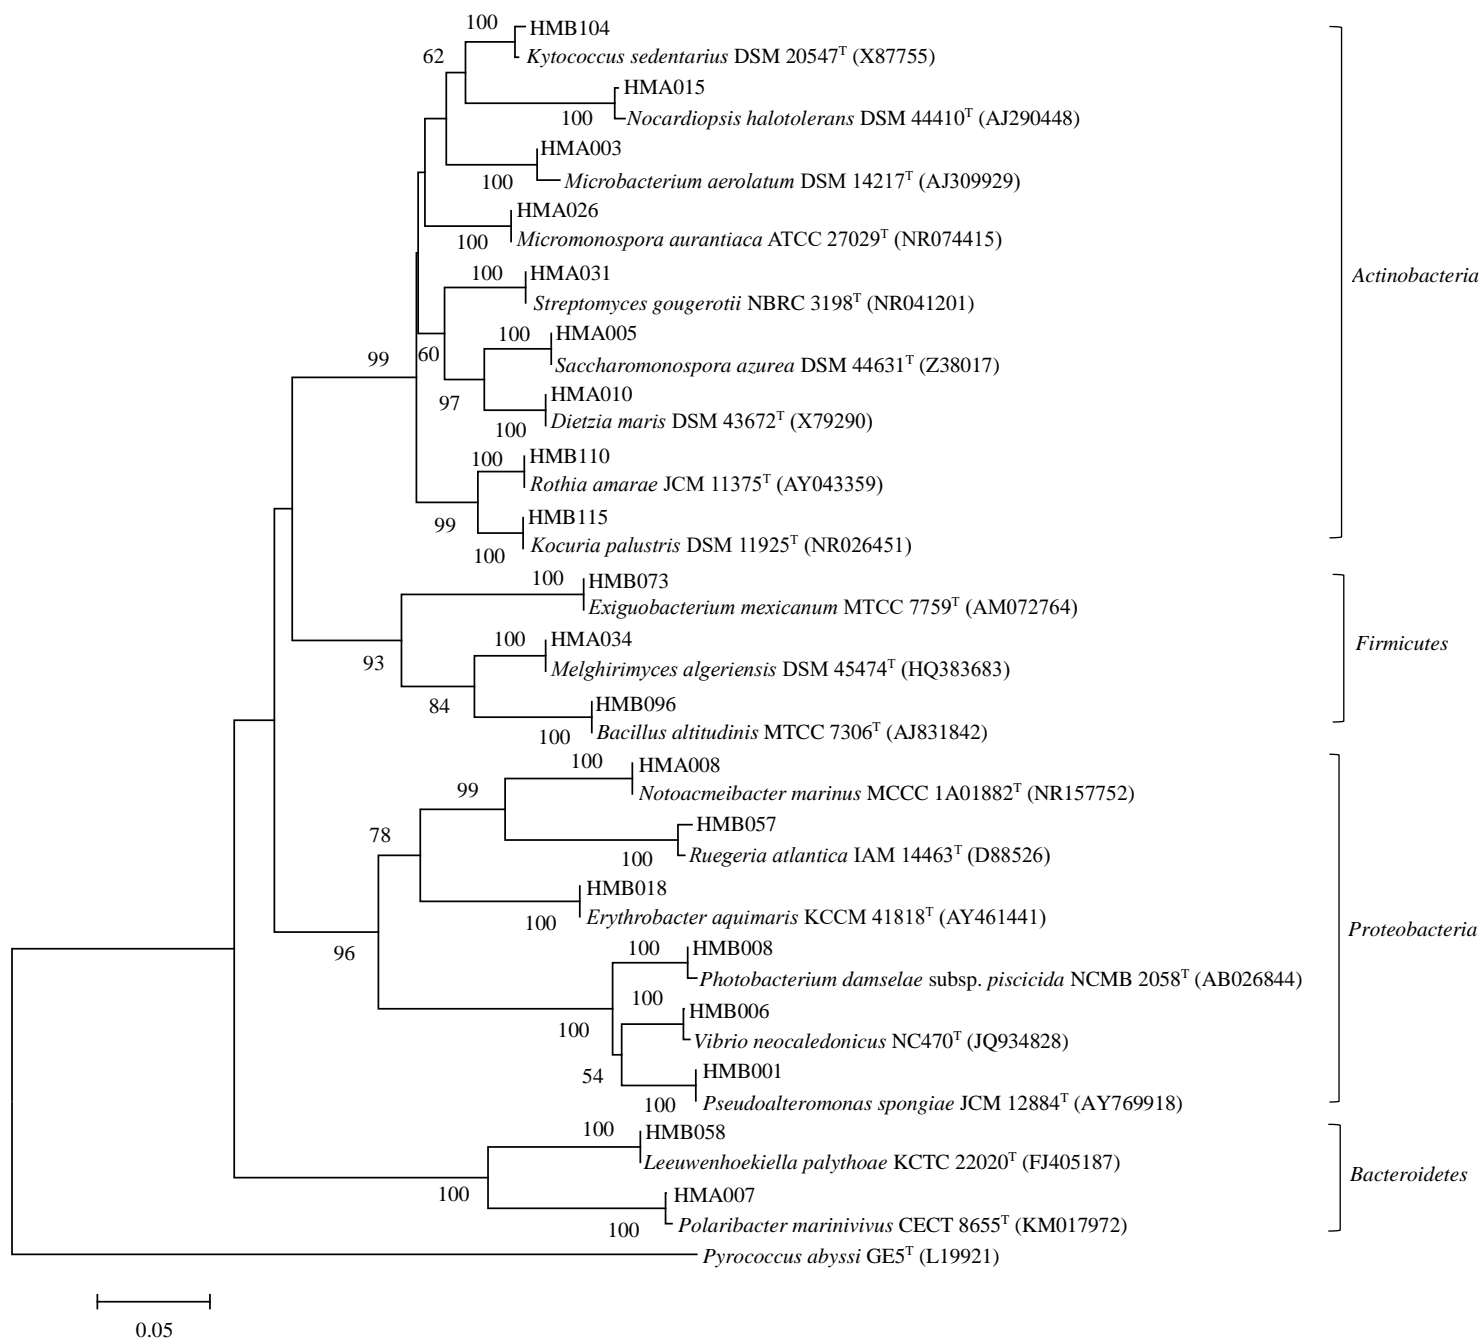

**Figure S1** Neighbour-joining phylogenetic tree based on comparisons of the 16S rRNA sequences of bacterial strains associated with the sponge *Ophlitaspongia* sp. and other related taxa. There are a total of 20 genera collected from the sponge, and we choose one species from each genus. The numbers on the tree indicate the percentages of bootstrap based on 1,000 replications and are shown for branches with more than 50% support. Bar represents 0.05 substitutions per nucleotide position.
